# Supplementary material for: Fabrication of tough photonic crystal patterns with vivid structural colors by direct handwriting
Source: Royal Society of Chemistry journal article supplement (doi:10.1039/c7nr06570a), 2017-01-01
Supplement: c7nr06570a1.pdf [file c7nr06570a1.pdf]

## Supporting Information

# Fabrication of tough photonic crystal patterns with vivid structural colors by direct handwriting

Xin Su, Yu Jiang, Xiaoqian Sun, Suli Wu\*, Bingtao Tang, Wenbin Niu and Shufen Zhang

*State Key Laboratory of Fine Chemicals, Dalian University of Technology, 2 Linggong Road, Dalian 116024, P.R. China.*

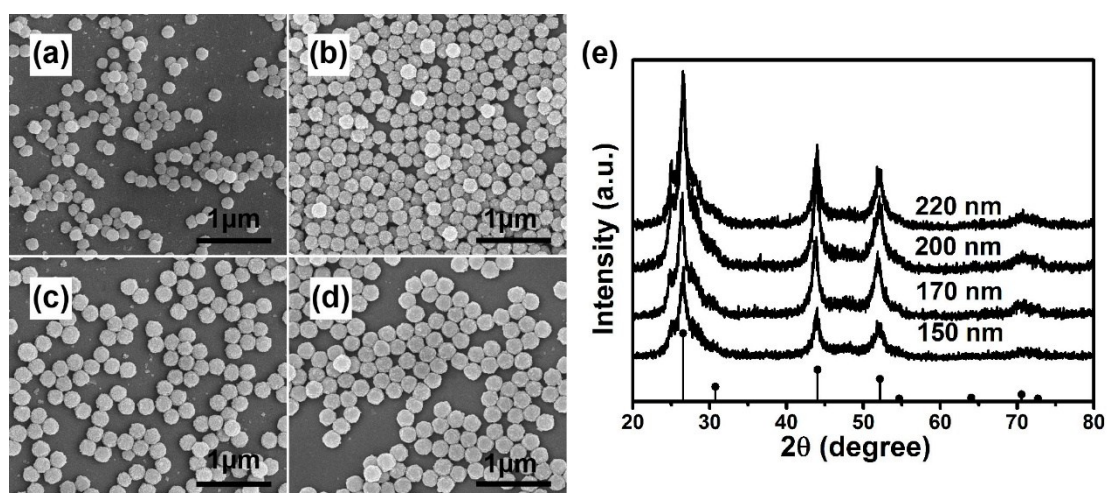

**Figure S1.** SEM images of monodisperse CdS spheres with different diameters as building blocks. (a) 150 nm; (b) 170 nm; (c) 200 nm; (d) 220 nm; (e) XRD patterns of corresponding CdS spheres

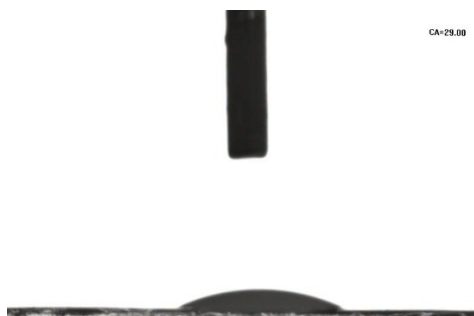

**Figure S2.** Optical images showing contact angles (CAs) of ink drops on the surface of nitrocellulose varnish film

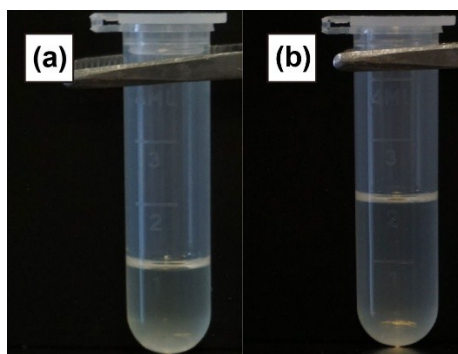

**Figure S3.** Digital images of (a) 1 mL of the nitrocellulose varnish solution; (b) solution obtained with 1 mL of ethanol added into (a) and fully mixed

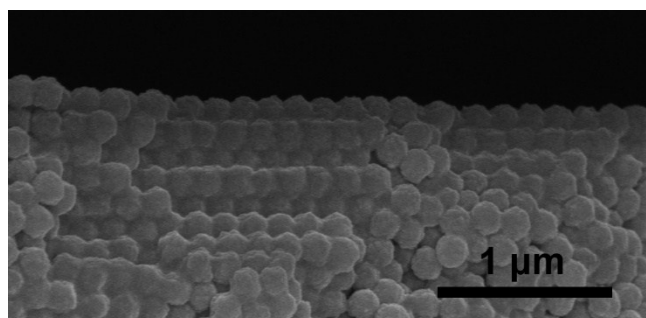

**Figure S4.** Cross-section SEM images of CdS/nitrocellulose varnish composite photonic crystal film obtained with 170 nm CdS spheres as building blocks

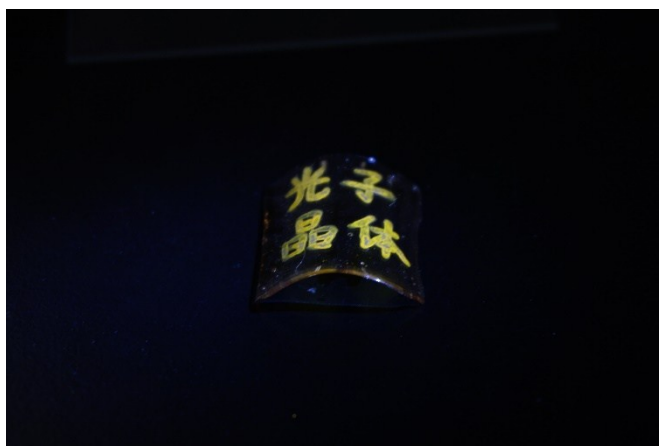

**Figure S5.** Digital photograph of a reshaped free-standing composite photonic crystal pattern
